# Supplementary material for: A Class of Protein-Coding RNAs Binds to Polycomb Repressive Complex 2 and Alters Histone Methylation
Source: Front Oncol. 2021 Nov 5;11:739830. doi: 10.3389/fonc.2021.739830 (PMC8602814; doi:10.3389/fonc.2021.739830)
Supplement: Supplementary file 4 [file Table_3.xlsx]

## Sheet: Sheet1
GSE16226
RNAs binding to SUZ12 in HeLa cell	RNAs binding to EZH2 in HeLa cell
AAR2	ACOXL
ABCA7	AHCYL2
ABCB7	AP5S1
ABI2	ATP5A1
AC093375.1	ATP6V1F
AC125421.1	BTN2A2
ACACA	C21orf67
ACOXL	C7orf60
ACTG2	CEP290
ADAM17	CLDN19
ADAM22	CRIP2
ADCY5	CRTC3
ADH4	DAD1
AFP	DPYSL4
AGAP3	EVA1C
AGBL1-AS1	FAM98B
AGO2	FCGR2C
AHCTF1	GTF2H5
AHCYL2	HYAL3
AIFM2	IL32
ALDOC	KCNMA1
ALKBH5	LUZP1
AMIGO2	MASTL
AMN	MEPCE
AMOTL1	METTL8
ANGPTL2	MST4
ANKIB1	MTF2
ANKRD50	MYO1C
ANKS3	PBRM1
AP1M1	PHIP
AP5S1	POLQ
AQP4	POU2AF1
ARFGEF1	PPIAL4D
ARGFX	RERE
ARHGAP35	RP11-887P2.5
ARID1A	RP5-1033H22.2
ARMC2-AS1	RPS15
ARMC9	RSRC1
ARPC1A	SLC44A5
ASAH1	SLC5A5
ASAP1-IT2	SMIM22
ASXL3	SMIM4
ATP11A-AS1	SNORA77
ATP2A1	SPIB
ATP5A1	SYT7
ATP6V1F	TBX2
ATPAF2	TMEM117
ATXN3	VPS53
BAG3	ZFP69B
BAIAP3
BAP1
BCAR3
BCAS2
BCAS3
BCL10
BDNF
BHLHB9
BPHL
BRIP1
BTG4
BTN2A2
C11orf91
C13orf45
C16orf45
C16orf95
C1orf105
C1orf112
C1orf127
C1QTNF3-AMACR
C20orf173
C21orf91-OT1
C4orf6
C5orf51
C6orf226
C7orf33
C7orf60
C7orf76
CA5B
CA9
CADM4
CARD10
CBX7
CCDC136
CCDC144B
CCDC28A
CCDC63
CD163
CD2BP2
CD81-AS1
CDC42BPA
CDC42BPG
CDC42EP4
CDC6
CDCA8
CDK5R1
CDYL2
CELF1
CELSR3
CENPO
CEP290
CEP68
CEP70
CHM
CHN2
CLDN19
CLDN25
COG6
COL13A1
COL16A1
COL27A1
COL6A3
COLEC11
COPS8
CRB1
CRBN
CRIM1
CRIP2
CRIP3
CROCCP3
CRTC3
CSNK2A1
CUTC
CWF19L2
CXCL17
CYP51A1
CYTH1
DAD1
DAG1
DAO
DAZAP1
DCAF10
DDHD1
DEGS2
DHRS7B
DIO1
DIRC3
DISC2
DLG5
DMP1
DMTF1
DNAJA3
DNAJC16
DNM1L
DOCK11
DPYSL4
DRD5
DVL1
EFHD2
EIF2AK2
EIF3A
EIF3CL
ELANE
ENGASE
ENTPD3-AS1
ERLIN1
EVA1C
EVL
EXO5
EZH2
FAM134B
FAM178B
FAM19A2
FAM208B
FAM220A
FAM35A
FAM71E1
FAM83F
FAM98B
FASTKD5
FBXO30
FBXO36
FBXW11
FBXW4
FBXW4P1
FCGR2C
FER
FGF14
FLJ26850
FLJ46906
FLNC
FNDC3B
FNIP1
FRMPD3
FUT4
GAGE12D
GAL3ST3
GALNT12
GAP43
GARNL3
GBAS
GBX1
GDPD3
GFI1
GGCT
GJB1
GLCCI1
GLE1
GLIS1
GMDS-AS1
GPATCH11
GPC6-AS2
GPR123
GPX4
GTF2H1
GTF2H5
GXYLT1
H2AFY2
HAAO
HCK
HCN4
HDAC2
HDAC7
HELB
HELLS
HIAT1
HIC2
HIP1
HLA-DOA
HNMT
HOXA2
HOXA3
HOXA4
HOXA6
HOXA9
HS6ST1
HSBP1
HSFX2
HYAL3
IAH1
IDI1
IDI2
IFT74
IFT81
IGF2BP3
IHH
IL32
INO80C
INPP5K
IPO8
IQCB1
IQCG
IQGAP2
ITGAD
ITGBL1
JUP
KBTBD2
KCNH1
KCNH3
KCNJ1
KCNJ15
KCNK10
KCNMA1
KCTD3
KDM4C
KDM6B
KIAA0355
KIAA0586
KIAA0754
KIAA0947
KIAA1210
KIAA1522
KIAA1958
KIF26B
KIF3B
KLC2
KLRK1
KPNA7
KRT7
KRT74
KRT81
KRT83
LACC1
LACE1
LAIR1
LAPTM4A
LARGE-AS1
LDB1
LDOC1L
LEPRE1
LGR4
LHFP
LMCD1-AS1
LMOD3
LPIN2
LRCH3
LRP2
LRR1
LRRC49
LYZL6
MAP3K5
MAPRE2
MASTL
MBOAT4
MBTPS1
MCF2L-AS1
MED13
MED4-AS1
MEPCE
METTL7B
METTL8
MFHAS1
MFSD4
MID2
MIER2
MIR637
MIR718
MKL1
MKL2
MLLT4
MLYCD
MMACHC
MNAT1
MPG
MROH1
MSI2
MST4
MTF2
MTHFD2
MUC17
MYEF2
MYH11
MYLK
MYO1C
MYOF
NAPG
NAT8
NBPF12
NBPF15
NCOA3
NCOR1
NDNL2
NDUFAF6
NECAB3
NEDD9
NELL2
NEO1
NETO1
NEURL1B
NFE2L3
NFIX
NINJ2
NKAIN3
NNT
NOP56
NR4A1
NRXN2
NT5DC2
NT5M
NTPCR
NUDT3
NUP133
NUP88
NWD1
OCA2
OGG1
OSBPL3
OSGIN1
OSMR
P4HA1
P4HA3
PACS1
PALD1
PAPOLG
PBRM1
PCNXL2
PDE12
PDE4D
PDE6A
PDE7A
PDGFRB
PEG3-AS1
PES1
PGBD5
PHACTR2
PHF6
PHIP
PIAS1
PIGS
PIK3R5
PIWIL2
PLA2G12A
PLAC8
PLAC8L1
PLB1
PLEKHG4B
PLEKHM2
PLVAP
PLXNA1
PLXND1
PMS2P5
POFUT2
POLA2
POLQ
POLR1C
POLR3A
POLR3H
POLR3K
POM121
POU2AF1
PPAPDC1B
PPFIBP1
PPIAL4D
PPIB
PPIC
PPP4R2
PPP5D1
PRDX1
PRF1
PRMT8
PRPS1
PRR14
PSD
PSPH
PTDSS1
PTGS1
PTPMT1
PTPN20B
PTPN23
PTPRC
PTX3
PURG
PVRL1
PXDN
R3HDML
RAB11FIP2
RAB42
RAB44
RAD51B
RALB
RAPSN
RARRES1
RASGEF1C
RAVER2
RBMS3
RBPMS-AS1
RBX1
RCAN1
RCE1
REL
RERE
RGPD2
RGS6
RHBDF1
RIPK2
RMDN2
RNF10
RNF219-AS1
RNH1
RP11-178L8.5
RP11-318M2.2
RP11-545I5.3
RP11-669N7.3
RP11-696N14.1
RP11-887P2.5
RP5-833A20.1
RPS15
RPSAP58
RRM1
RSF1
RSPH10B
RSPH10B2
RSRC1
RTN4
SBNO2
SCARB2
SCARNA22
SCYL3
SDCBP2-AS1
SDHAP3
SEMA6D
SERAC1
SERPINF1
SETD2
SF1
SGSM3
SH2B2
SH3BP1
SH3TC1
SH3YL1
SHANK2-AS1
SIL1
SKIV2L2
SLC1A6
SLC35E2
SLC37A3
SLC38A8
SLC44A5
SLC46A2
SLC5A5
SLC6A18
SMCR5
SMIM18
SMIM22
SMIM4
SNRNP27
SNRNP35
SNX24
SNX31
SOCS5
SPAG5
SPAG6
SPATA13
SPATA2
SPATS2
SPIB
SPIN3
SPINK9
SPRED1
SRBD1
SRPK2
SRRM5
SSR1
STARD7-AS1
STARD8
STAU1
STK10
SVOP
SYNRG
SYT7
TATDN1
TBATA
TBC1D16
TBX2
TCP10L
TCTN3
TDG
TECPR2
TEKT5
TEX9
TFEC
THEM4
THUMPD3
TKT
TMEM117
TMEM126A
TMEM161B
TMEM181
TMEM200B
TMEM207
TMF1
TMPRSS13
TMTC3
TNFSF13
TNFSF4
TNPO3
TNRC18
TNRC6B
TOPBP1
TOR2A
TPST1
TPTE2
TPX2
TRIM49D2P
TRIM5
TRMT44
TSPAN16
TSPAN32
TTF1
TTN
TTYH2
TUSC2
TXNDC11
UBE2Q2
UBE2R2
UBE2S
UBE2V1
UBE4B
UBLCP1
UGGT1
URM1
USP6NL
VDAC1
VPS53
VRK2
VTI1B
WDFY3
WDR25
WHSC1
XIRP2
XKR8
YBX1
YTHDC2
ZAK
ZBTB7C
ZBTB8A
ZDHHC11
ZFAND3
ZFHX4-AS1
ZFP69B
ZHX2
ZKSCAN4
ZNF208
ZNF322
ZNF417
ZNF521
ZNF564
ZNF608
ZNF776
ZZZ3
